# Supplementary material for: Ubiquitous Polygenicity of Human Complex Traits: Genome-Wide Analysis of 49 Traits in Koreans
Source: PLOS journal article supplement (doi:10.1371/journal.pgen.1003355), 2013-03-07

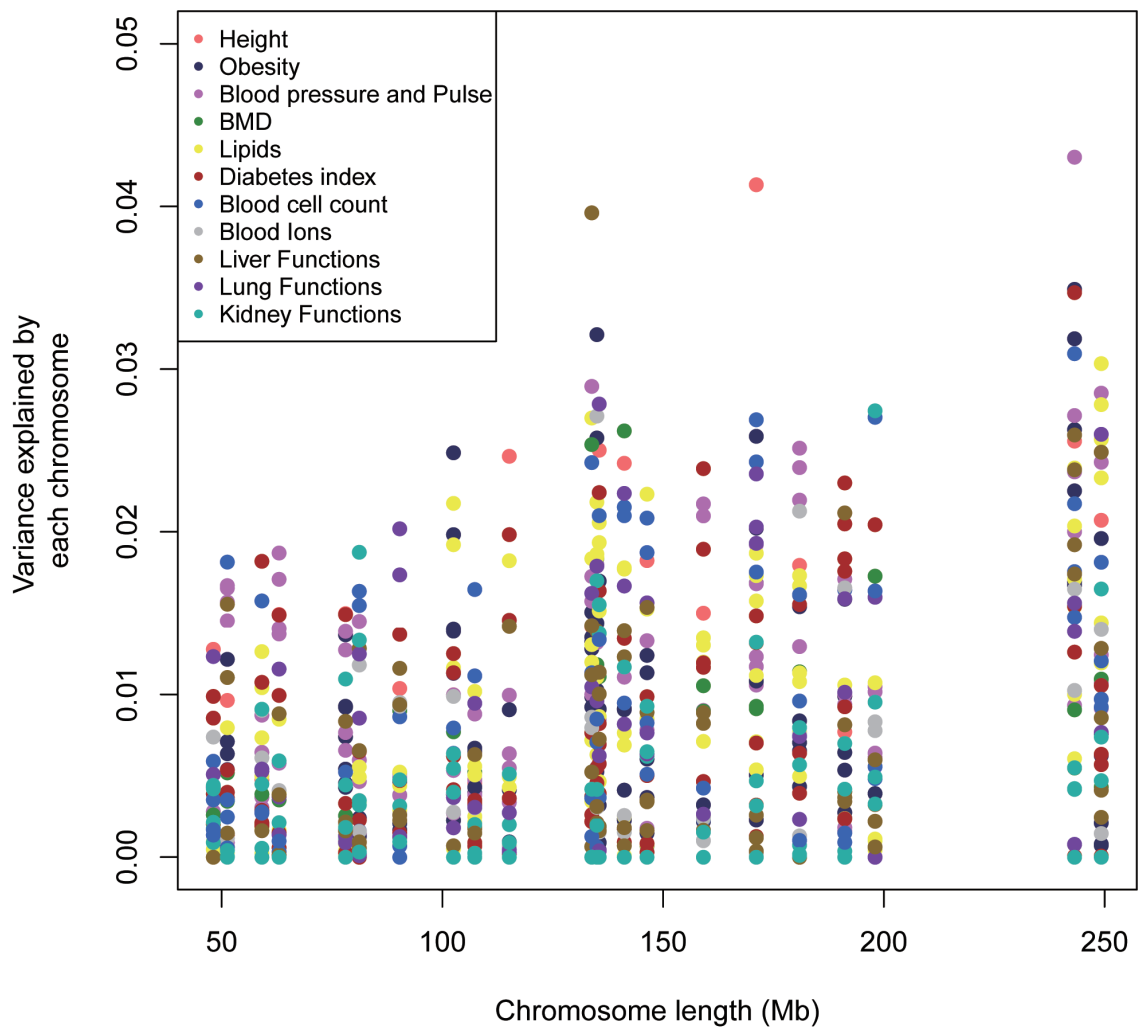

Supplement: S7 (10.1371/journal.pgen.1003355.s007) [file journal.pgen.1003355.s007]
