# Supplementary material for: Ubiquitous Polygenicity of Human Complex Traits: Genome-Wide Analysis of 49 Traits in Koreans
Source: PLOS journal article supplement (doi:10.1371/journal.pgen.1003355), 2013-03-07
Supplement: S12 (10.1371/journal.pgen.1003355.s012) [file journal.pgen.1003355.s012]

|                              | <b>± 0Kb</b> | <b>± 20Kb</b> | <b>± 50Kb</b> |
|------------------------------|--------------|---------------|---------------|
| Coverage of genic regions    | 36.1%        | 49.2%         | 58.9%         |
| Estimated $h_{G_g}^2$        | 0.0637       | 0.0889        | 0.0996        |
| SE                           | 0.0060       | 0.0066        | 0.0069        |
| Estimated $h_{G_i}^2$        | 0.0655       | 0.0445        | 0.0341        |
| SE                           | 0.0068       | 0.0059        | 0.0052        |
| Expected $h_{G_g}^2$         | 0.047        | 0.066         | 0.079         |
| Expected $h_{G_i}^2$         | 0.083        | 0.068         | 0.055         |
| Goodness of fit test p-value | 1.6E-04      | 1.3E-07       | 5.4E-07       |

Note: The SE of averaged estimate was calculated as  $SE = \frac{1}{t} \sqrt{\sum_{i=1} S_i^2}$ , where  $S_i$  is the standard error of the estimate for each trait and  $t$  is the effective number of independent traits with  $t = 34.0$ , which was calculated by matrix spectral decomposition of the phenotypic correlation matrix [1].

## Reference

1. Li J, Ji L (2005) Adjusting multiple testing in multilocus analyses using the eigenvalues of a correlation matrix. *Heredity* (Edinb) 95: 221-227.
